# Supplementary material
Source: publisher site journal article supplement (https://www.dovepress.com/article/591312)
Supplement: Supplementary file 1 [file 591312-Supplementary%20Material.docx]

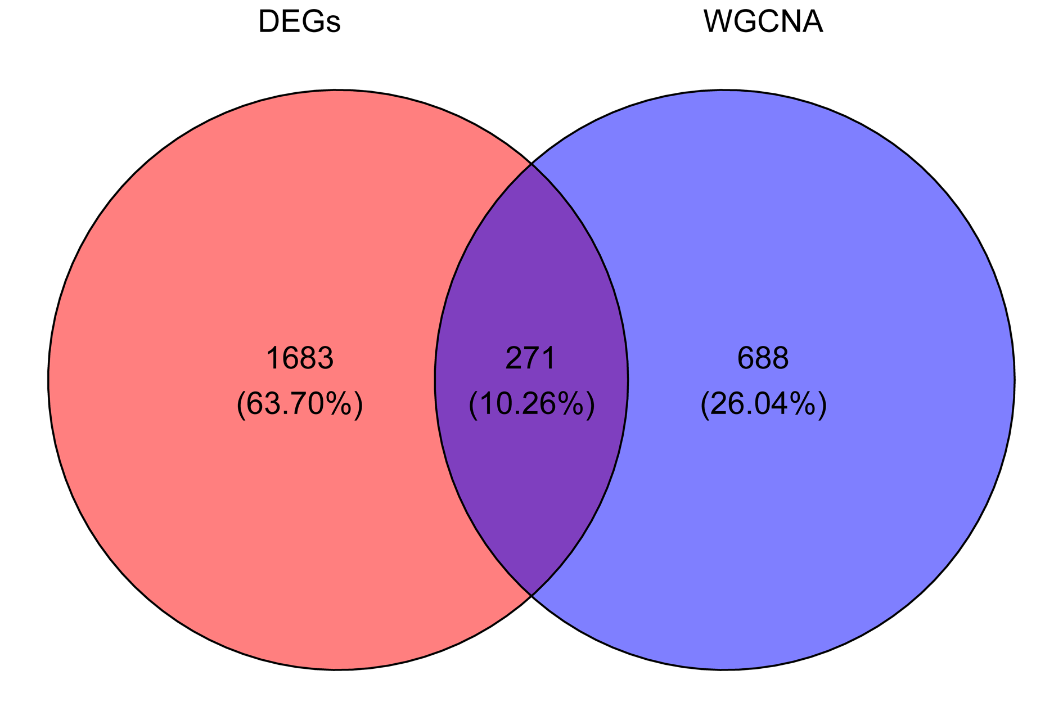


**Supplementary Figure 1 Venn diagram of the gene intersection between DEGs and the tendon injury-related genes derived from WGCNA.**

**Supplementary Table 1 The primer sequences.**

| **Gene** | **Primer sequences (5’ to 3’)** |
| --- | --- |
| FER-F | TGTCTCGTCAAGAGGATGGTG |
| FER-R | CAAACCCCTAAGCTGAAGGTC |
| TUBA1B-F | GAGCAACACCACAGCCATTG |
| TUBA1B-R | AGGGCAGCCATATCTTCACG |
| MICAL2-F | AAGAGGGCTCAGAACTTGGC |
| MICAL2-R | CTGGCAGGAGAAGCAGAGTC |
| GAPDH-F | GGAGCGAGATCCCTCCAAAAT |
| GAPDH-R | GGCTGTTGTCATACTTCTCATGG |
| ACTB-F | CATGTACGTTGCTATCCAGGC |
| ACTB-R | CTCCTTAATGTCACGCACGAT |
